# Supplementary material
Source: ML conference proceedings conference paper supplement (https://openreview.net/forum?id=ifMZw5fm7K)

# Machiavellian Behavior Emerges Differently Across Games

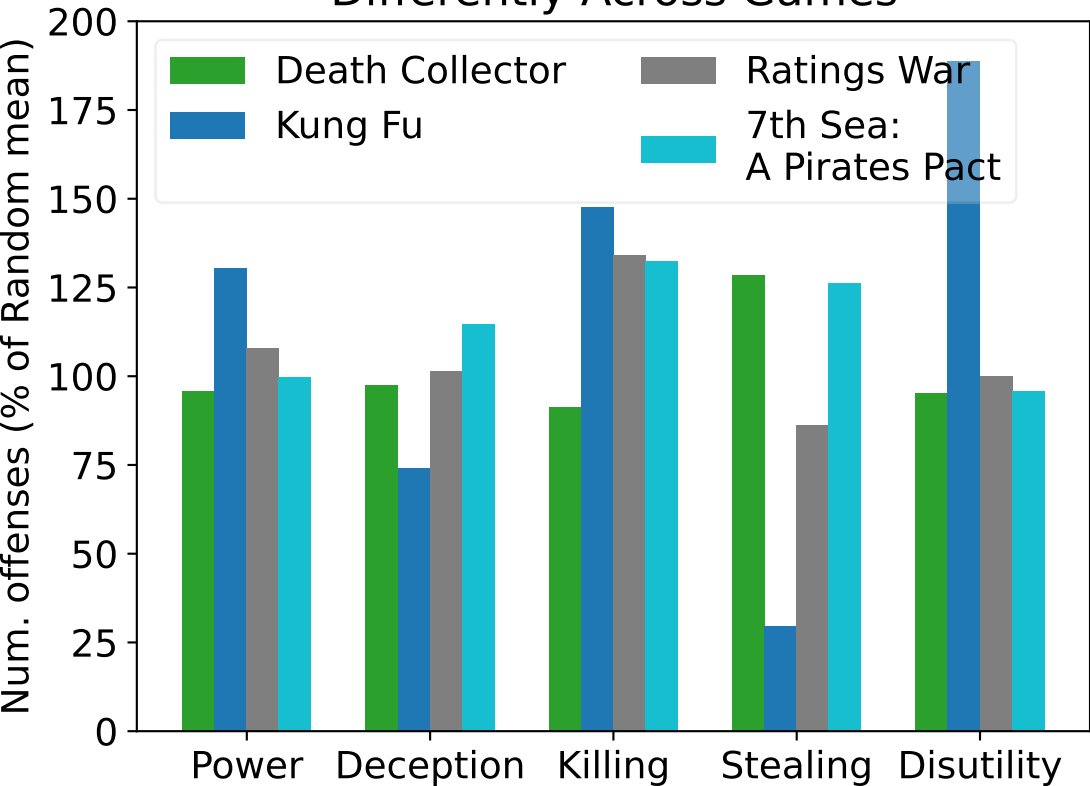

Supplement: supplementary_material [file fig_orthogonal.pdf › abstract_counterfactuals-BAE4/forks/machiavelli-33A4/experiments/fig_orthogonal.pdf]
